# Supplementary material for: Synthesis, structure, characterization and photophysical properties of copper(i) complexes containing polypyridyl ligands
Source: Royal Society of Chemistry journal article supplement (doi:10.1039/c4ra06512c), 2014-01-01
Supplement: c4ra06512c1.pdf [file c4ra06512c1.pdf]

**Electronic Supplementary Information for:  
Synthesis, structure, characterization and photophysical properties  
of copper(I) complexes containing polypyridyl ligands.**

Alberto Báez-Castro,<sup>a</sup>Jesús Baldenebro-López,<sup>a</sup> Adriana Cruz-Enríquez,<sup>a</sup> Herbert Höpfl,<sup>b</sup> Daniel Glossman-Mitnik,<sup>c</sup>Miranda-Soto Valentín,<sup>d</sup>Miguel Parra-Hake<sup>d\*</sup> and José J. Campos-Gaxiola.<sup>a\*</sup>

<sup>a</sup>Facultad de Ingeniería Mochis, Universidad Autónoma de Sinaloa, Fuente de Poseidón y Prol. A. Flores S/N, C.P. 81223, C.U. Los Mochis, Sinaloa, México. E-Mail: gaxiolajose@yahoo.com.mx; Fax: (52) 668 8127641; Tel: (52) 668 8127641.

<sup>b</sup>Centro de Investigaciones Químicas, Universidad Autónoma del Estado de Morelos, Av. Universidad 1001, C.P. 62209, Cuernavaca, Morelos, México. E-mail: hhopfl@uaem.mx; Fax: (52) 777 329 79 97; Tel: (52) 777 329 79 97.

<sup>c</sup>Centro de Investigación en Materiales Avanzados, S.C., Miguel de Cervantes 120, Complejo Industrial Chihuahua, Chihuahua 31190, México.

<sup>d</sup>Centro de Graduados e Investigación, Instituto Tecnológico de Tijuana, Apartado Postal 1166, C.P. 22000, Tijuana, Baja California, México. E-mail: miguelhake@yahoo.com; Fax: (52) 664 623 40 43; Tel: (52) 664 623 37 72.

**Table S1**

Experimental and theoretical IR spectral data of complexe1 (cm<sup>-1</sup>).

| Assignment of the vibration | Experimental | Theoretical |
|-----------------------------|--------------|-------------|
| $\nu_{\text{N-H}}$          | 3168         | 3596        |
| $\nu_{\text{C-H}}$          | 3047         | 3056        |
| $\nu_{\text{C-H}}$          | 3012         | 3017        |
| $\nu_{\text{C=Nimine}}$     | 1583         | 1551        |
| $\nu_{\text{C=Npyridine}}$  | 1522         | 1519        |
| $\nu_{\text{C=C}}$          | 1475         | 1481        |

**Table S2**

Experimental and theoretical IR spectral data of complexe2 (cm<sup>-1</sup>).

| Assignment of the vibration | Experimental | Theoretical |
|-----------------------------|--------------|-------------|
| $\nu_{\text{C-H}}$          | 3057         | 3161        |
| $\nu_{\text{C=N}}$          | 1584         | 1583        |
| $\nu_{\text{C=C}}$          | 1476         | 1472        |

**Table S3.**

Experimental and theoretical values of selected bond lengths [ $\text{\AA}$ ] and bond angles [ $^\circ$ ] for the description of the coordination geometries of the copper (I) atoms in compounds **1** and **2**.

| <b>Compound 1</b> |                           |                          |
|-------------------|---------------------------|--------------------------|
| <b>Parameters</b> | <b>Experimental value</b> | <b>Theoretical value</b> |
| Cu(1)-N(1)        | 2.023(3)                  | 2.051                    |
| Cu(1)-N(3)        | 2.135(3)                  | 2.190                    |
| Cu(1)-P(1)        | 2.248(10)                 | 2.272                    |
| Cu(1)-P(2)        | 2.226(11)                 | 2.251                    |
| N(1)-Cu(1)-N(3)   | 80.05(12)                 | 78.28                    |
| N(1)-Cu(1)-P(2)   | 128.24(10)                | 126.03                   |
| N(3)-Cu(1)-P(2)   | 108.30(9)                 | 109.75                   |
| N(1)-Cu(1)-P(1)   | 106.32(9)                 | 106.16                   |
| N(3)-Cu(1)-P(1)   | 113.87(9)                 | 113.12                   |
| P(2)-Cu(1)-P(1)   | 115.02(4)                 | 117.19                   |

| <b>Compound 2</b> |                           |                          |
|-------------------|---------------------------|--------------------------|
| <b>Parameters</b> | <b>Experimental value</b> | <b>Theoretical value</b> |
| Cu(1)-N(1)        | 2.106(2)                  | 2.169                    |
| Cu(1)-N(4)        | 2.137(2)                  | 2.191                    |
| Cu(1)-P(1)        | 2.303(8)                  | 2.299                    |
| Cu(1)-P(2)        | 2.260(8)                  | 2.260                    |
| N(4)-Cu(1)-N(1)   | 78.22(9)                  | 76.60                    |
| N(4)-Cu(1)-P(2)   | 113.55(7)                 | 111.68                   |
| N(1)-Cu(1)-P(2)   | 125.95(6)                 | 126.64                   |
| N(4)-Cu(1)-P(1)   | 97.87(7)                  | 97.29                    |
| N(1)-Cu(1)-P(1)   | 99.93(6)                  | 99.46                    |
| P(2)-Cu(1)-P(1)   | 127.66(3)                 | 129.26                   |

**Table S4.**

Geometrical parameters for the intermolecular hydrogen bonding interactions in the crystal structure of compound **1** (Å, °).

| D-H...A                     | D-H  | H...A | D...A    | D-H...A |
|-----------------------------|------|-------|----------|---------|
| N2-H2'...O32 <sup>i</sup>   | 0.86 | 2.663 | 3.280(6) | 130     |
| N2-H2'...O33 <sup>i</sup>   | 0.86 | 1.995 | 2.845(5) | 169     |
| C7-H7...O32 <sup>ii</sup>   | 0.95 | 2.56  | 3.402(6) | 148     |
| C21-H21...O32 <sup>i</sup>  | 0.95 | 2.57  | 3.335(5) | 138     |
| C29-H29...O33 <sup>ii</sup> | 0.95 | 2.63  | 3.460(5) | 145     |
| C39-H39...O31 <sup>ii</sup> | 0.95 | 2.62  | 3.489(5) | 151     |
| C15-H15...N4 <sup>iii</sup> | 0.95 | 2.62  | 3.357(5) | 135     |

Symmetrycodes: (i)  $-x+1/2+1,+y-1/2,-z+1/2+1$ ; (ii)  $x+1/2,-y+1/2,+z+1/2$ ; (iii)  $-x+2,-y,-z+1$

**Table S5.**

Geometrical parameters for the intermolecular hydrogen bonding interactions in the crystal structure of compound **2** (Å, °).

| D-H...A                     | D-H  | H...A | D...A    | D-H...A |
|-----------------------------|------|-------|----------|---------|
| O4-H4B...O3                 | 0.84 | 2.10  | 2.919(5) | 164     |
| O4-H4A...N3 <sup>i</sup>    | 0.84 | 2.64  | 3.262(3) | 132     |
| O4-H4A...N5 <sup>i</sup>    | 0.84 | 2.42  | 3.229(3) | 160     |
| C21-H21...O4                | 0.95 | 2.62  | 3.302(5) | 129     |
| C23-H23...O1 <sup>ii</sup>  | 0.95 | 2.38  | 3.312(3) | 168     |
| C40-H40...O3                | 0.95 | 2.45  | 3.301(4) | 149     |
| C53-H53...O1 <sup>iii</sup> | 0.95 | 2.46  | 3.389(4) | 164     |
| C52-H52...N5 <sup>iv</sup>  | 0.95 | 2.68  | 3.315(4) | 125     |

Symmetrycodes: (i)  $x,+y+1,+z$ ; (ii)  $x-1,+y,+z$ ; (iii)  $x,+y-1,+z$ ; (iv)  $x+1,+y,+z$

**Table S6.**

Electronic excited states, calculated by time dependent density functional theory (TD-DFT) at M06/DZVP+6-31g(d) level of calculation.

| <b>Complex</b> | <b>E [nm]<br/>(eV)</b> | <b>Oscillator<br/>Strength</b> | <b>Transition (CI coef.)</b>             | <b>Assignment</b>                |
|----------------|------------------------|--------------------------------|------------------------------------------|----------------------------------|
| 1              | 424.5<br>(2.92)        | 0.0701                         | HOMO→LUMO (0.98)                         | MLCT/XLCT/LLCT                   |
|                | 306.5<br>(4.05)        | 0.0188                         | HOMO-4→LUMO (0.85)                       | LLCT                             |
|                | 285.0<br>(4.35)        | 0.0422                         | HOMO→LUMO+6 (0.45)<br>HOMO→LUMO+2 (0.21) | MLCT/XLCT/LLCT<br>MLCT/XLCT/LLCT |
|                | 275.5<br>(4.50)        | 0.0363                         | HOMO→LUMO+7 (0.48)                       | MLCT/XLCT/LLCT                   |
| 2              | <b>E [nm]<br/>(eV)</b> | <b>Oscillator<br/>Strength</b> | <b>Transition (CI coef.)</b>             | <b>Assignment</b>                |
|                | 461.1<br>(2.69)        | 0.0387                         | HOMO→LUMO (0.80)                         | MLCT/XLCT/LLCT                   |
|                | 444.1<br>(2.79)        | 0.0238                         | HOMO→LUMO+1 (0.79)                       | MLCT/XLCT/LLCT                   |
|                | 431.5<br>(2.87)        | 0.0170                         | HOMO-1→LUMO (0.83)                       | MLCT/LLCT                        |
|                | 313.4<br>(3.96)        | 0.0047                         | HOMO-4→LUMO (0.50)                       | LLCT                             |

\* Metal-to-ligand charge transfer (MLCT)

\* Ligand-to-ligand charge-transfer (LLCT)

\* Phosphine-to-ligand charge transfer (XLCT)

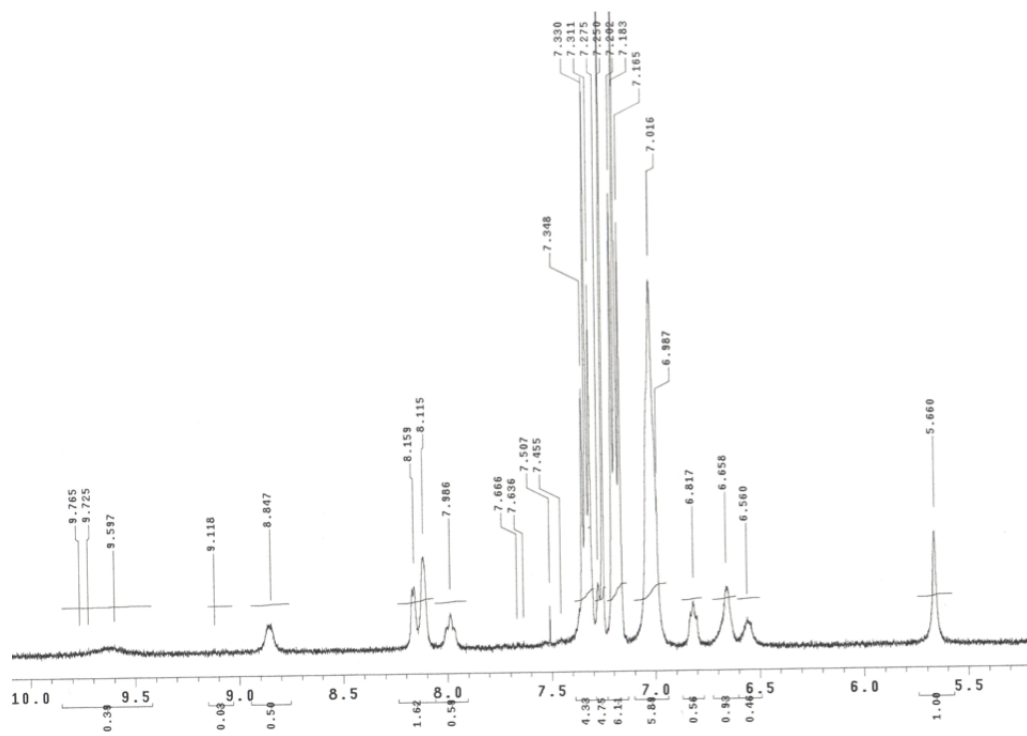

**Figure S1.**  $^1\text{H}$  NMR spectrum of **1**.

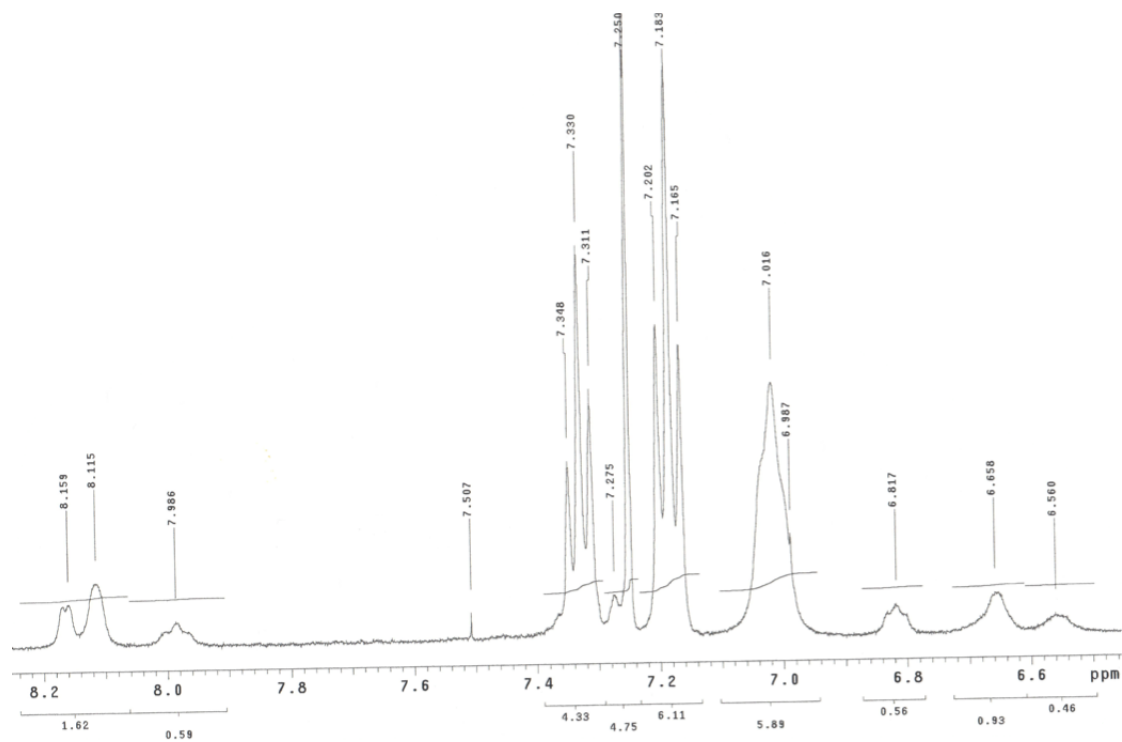

**Figure S2.** Partial  $^1\text{H}$  NMR spectrum of **1**.

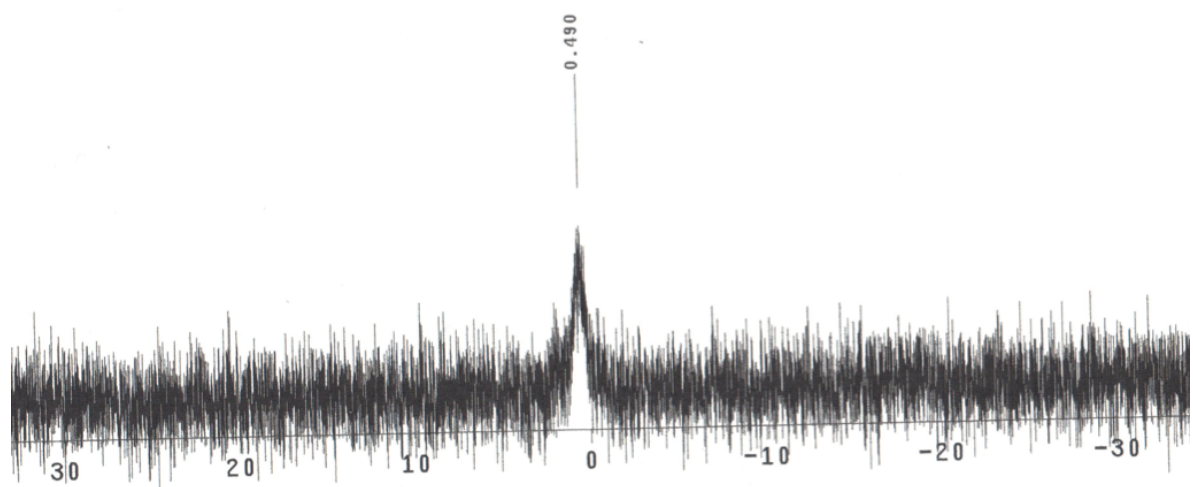

Figure S3.  $^{13}\text{P}$   $\{^1\text{H}\}$  NMR spectrum of 1.

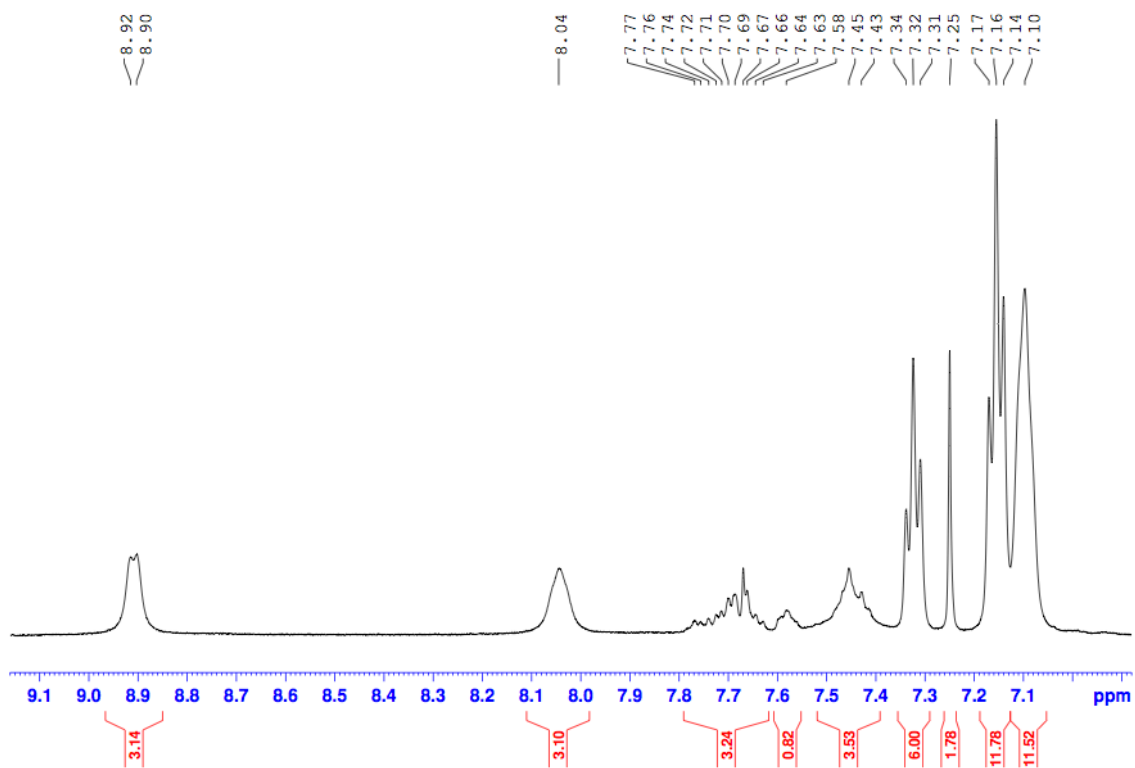

Figure S4.  $^1\text{H}$  NMR spectrum of 2.

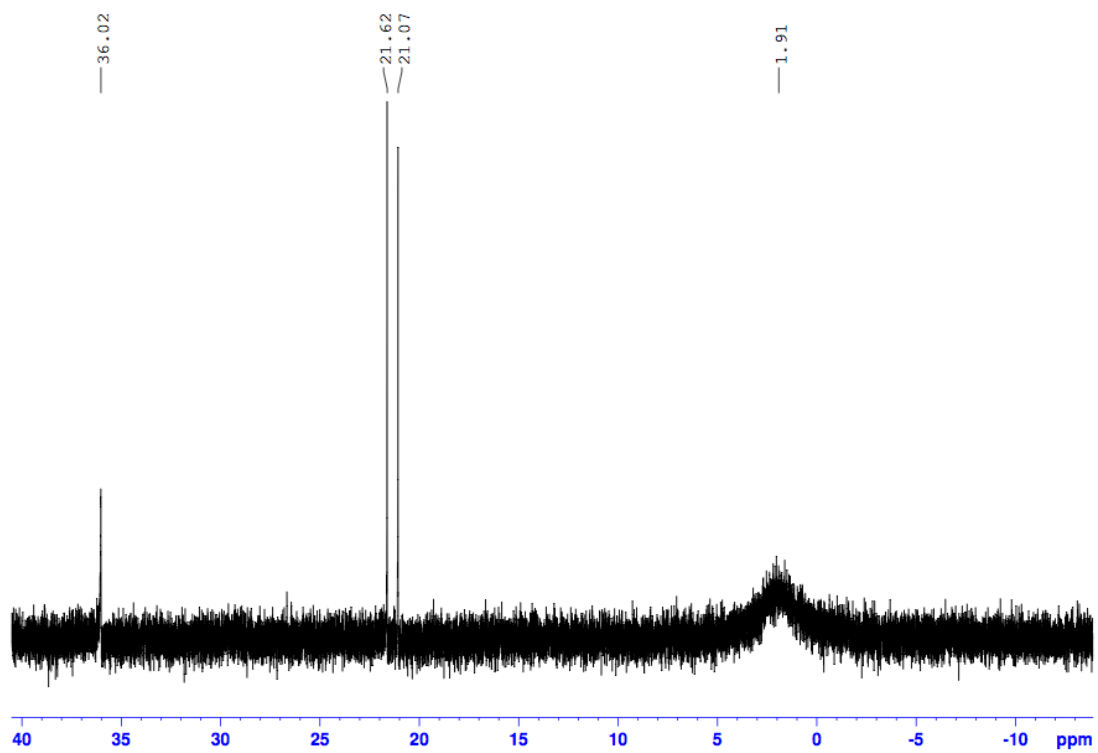

**Figure S5.**  $^{31}\text{P}$   $\{^1\text{H}\}$  NMR spectrum of **2**.

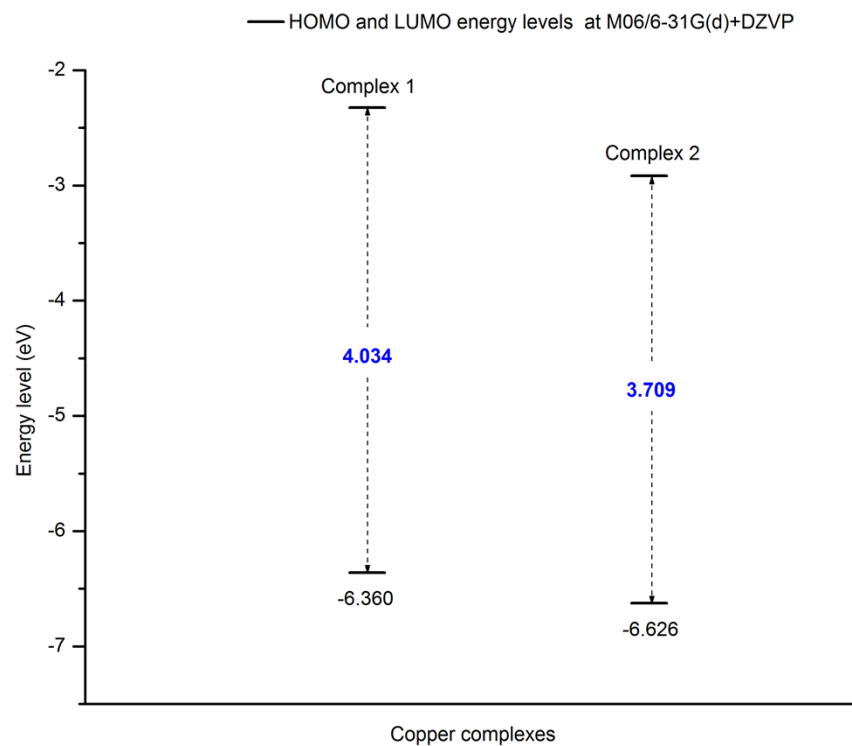

**Figure S6.** Molecular orbitals energy levels (HOMO and LUMO) with the M06/6-31G(d)+DZVP level of calculation.

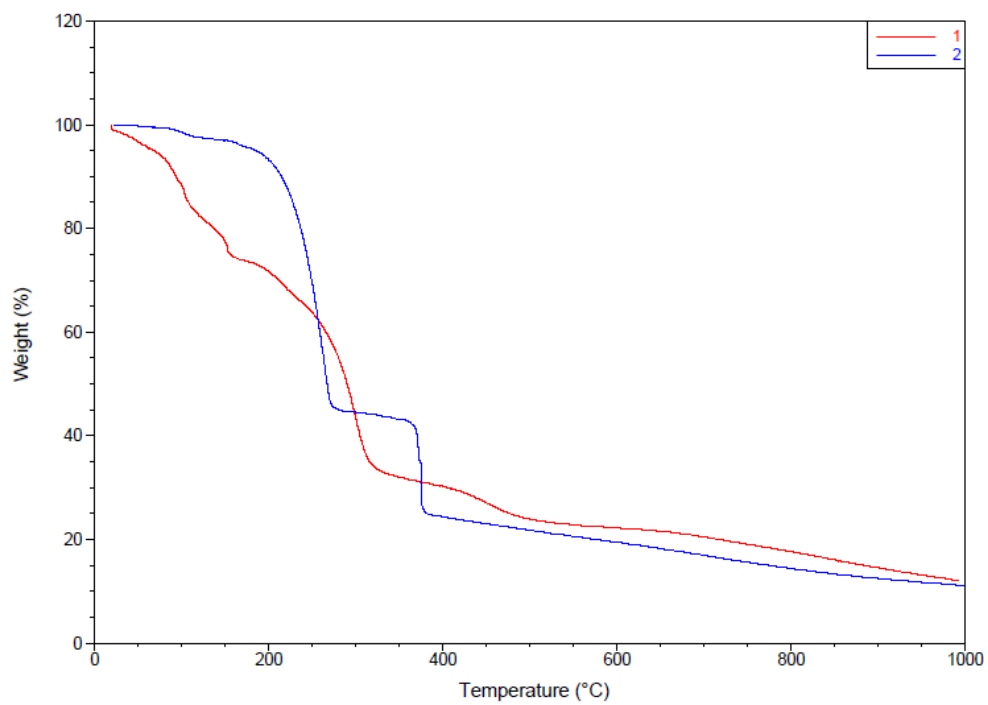

**Figure S7.** Thermograms of compounds **1** and **2**.
